# Supplementary material
Source: PubMed Central journal article supplement (PMC6322544)
Supplement: NIHMS999888-supplement-Suppl__Data.pdf [file NIHMS999888-supplement-Suppl__Data.pdf]

Supporting Information for:

**Tissue Inhibitor of Metalloprotease-2 (TIMP-2): bioprocess development, physicochemical, biochemical and biological characterization of highly expressed recombinant protein**

Anandã Chowdhury<sup>1</sup>, Robert Brinson<sup>2</sup>, Beiyang Wei<sup>1</sup> and William G. Stetler-Stevenson<sup>1\*</sup>

<sup>1</sup>Radiation Oncology Branch, Center for Cancer Research, National Cancer Institute, Bethesda, MD

<sup>2</sup>Institute for Bioscience and Biotechnology Research, National Institute of Standards and Technology and the University of Maryland, 9600 Gudelsky Drive, Rockville, MD

Supporting Information S1

mRNA structure based on cDNA sequences for **(A.)** wt TIMP-2 (pT2MO1) and **(B.)** codon optimized rhTIMP-2-6XHis.

Supporting information S2

Table describing additional mouse pathogen testing of purified rhTIMP-2-6XHis.

## Supplemental Information S1

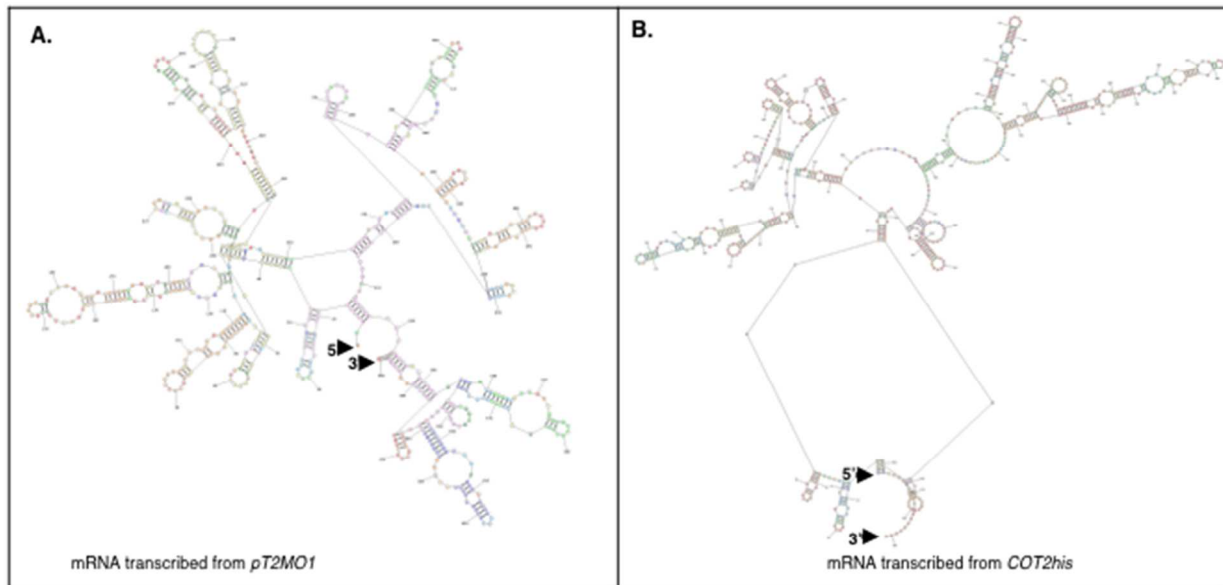

## Supplemental Information S2

| <b>Mouse Pathogen List<br/>(tested for presence in rTIMP-2 preps)</b> |                                          |               |
|-----------------------------------------------------------------------|------------------------------------------|---------------|
| 1                                                                     | Mouse Hepatitis Virus                    | MHV           |
| 2                                                                     | Polyoma Virus                            | POLY          |
| 3                                                                     | Sendai Virus                             | SEN           |
| 4                                                                     | Pneumonia Virus of Mice                  | PVM           |
| 5                                                                     | Reovirus 3                               | REO3          |
| 6                                                                     | Minute Virus of Mice                     | MVM           |
| 7                                                                     | Theiler's Murine encephalomyelitis virus | GDVII or TMEV |
| 8                                                                     | Lymphocytic choriomeningitis virus       | LCMV          |
| 9                                                                     | Ectromelia virus                         | ECT           |
| 10                                                                    | Lactic dehydrogenase-elevating virus     | LDHV          |
| 11                                                                    | Mycoplasma spp.                          | MYCO          |
